# Supplementary material for: Measuring coral calcification under ocean acidification: methodological considerations for the 45Ca-uptake and total alkalinity anomaly technique
Source: PeerJ. 2017 Sep 1;5:e3749. doi: 10.7717/peerj.3749 (PMC5582612; doi:10.7717/peerj.3749)
Supplement: Table S5 — Two-Way ANOVA results on effects of pH (pHT 8.1 vs. 7.5) and incubation time (time period 2 h, 4 h, 6 h) on changes in variables related to seawater chemistry shown in Table 4. Asterisks indicate statistical significance with N = 6. [file peerj-05-3749-s008.docx]

Table S5. Two-Way ANOVA results on effects of pH (pHT 8.1 vs. 7.5) and incubation time (time period 2h, 4h, 6h) on changes in variables related to seawater chemistry shown in Table 4. Asterisks indicate statistical significance with N = 6.

|  | **Alkalinity** | **DIC** | **pH** | **CO2(aq)** | **HCO3-** | **CO32-** |
| --- | --- | --- | --- | --- | --- | --- |
| pH | *F*1,34 = 25.939,  p < 0.0001* | *F*1,34 = 1.591,  p = 0.2170 | *F*1,34 = 9.567,  p = 0.0043* | *F*1,34 = 125.940,  p < 0.0001* | *F*1,34 = 0.086,  p = 0.7720 | *F*1,34 = 0.053,  p = 0.4721 |
| time | *F*2,33 = 11.718, p = 0.0002* | *F*2,33 = 74.664,  p < 0.0001* | *F*2,33 = 83.740,  p < 0.0001* | *F*2,33 = 32.019,  p < 0.0001* | *F*2,33 = 93.826,  p < 0.0001* | *F*2,33 = 72.858,  p < 0.0001* |
| pH x time | N/A | *F*2,30 = 4.235,  p = 0.0240* | *F*2,30 = 10.748,  p = 0.0003* | *F*2,30 = 16.533,  p < 0.0001* | *F*2,30 = 5.211,  p = 0.0114* | *F*2,30 = 6.572,  p = 0.0043* |
